# Supplementary material for: Complementary Approaches to Assess Phytoplankton Groups and Size Classes on a Long Transect in the Atlantic Ocean
Source: Frontiers journal article supplement (doi:10.3389/fmars.2021.682621), 2022-01-11
Supplement: Table_1.XLSX [file Table_1.XLSX]

## Sheet: Final
stations code AMT 25			001	002	003	004	005	006	007	008	009	010	011	012	016	021	022	024	025	026	027	028	029	030	031	032	033	034	035	036	037	038	039	040	041	042	043	044	045	046	047	048	050	051	052	053	054	055	058
Latitude			48.4083	47.5096	46.2764	45.5927	44.4558	43.7119	42.3078	41.5246	40.0411	39.2032	37.6887	37.5075	36.2285	31.151	30.1005	27.4746	25.9337	25.4532	23.8985	22.9867	21.466	20.5801	19.2677	18.4807	17.1778	16.4329	15.0956	13.3793	12.369	9.99528	8.56755	5.87738	4.40308	1.93295	0.490117	-1.68015	-4.42375	-5.39238	-7.10998	-7.85793	-10.1136	-11.2348	-13.0002	-14.0205	-15.691	-16.5713	-20.5417
Longitude			9.19732	11.0623	12.9354	13.9912	15.689	16.7791	18.8061	19.8713	21.9172	23.0455	25.0588	26.6605	32.7719	40.918	41.9392	41.1108	38.8271	38.0744	35.7557	34.3891	32.0755	30.7697	28.995	28.028	26.4558	25.5498	23.9468	22.905	22.5324	21.6016	21.0369	20.0271	19.4307	18.4323	17.8436	16.977	15.8679	15.455	14.7595	14.4413	16.5745	17.6946	19.4722	20.5	22.1882	23.101	25.0687
SPP CODE according to Sal et al. Database
		pg carbon per cell	mg carbon m-3
	1. DIATOMS
D2	Actinoptychus spp.	1531	0	0	0	61.24	0	0	0	0	0	0	0	0	0	0	0	0	0	0	0	0	0	0	0	0	0	0	0	0	0	0	0	0	0	0	0	0	0	0	0	0	0	0	0	0	0	0	0
D5_1	Asterolampra marylandica	1597.59	0	0	0	0	0	0	0	0	0	0	0	0	0	0	0	0	0	0	0	0	0	0	0	0	0	0	0	0	0	0	0	0	0	0	0	0	0	0	0	0	0	0	0	0	0	0	15.9759
D5_A	Asteromphalus flabellatus	4273	0	85.46	0	0	0	0	0	0	0	0	0	0	0	0	0	0	0	0	0	0	0	0	0	0	0	0	0	0	0	0	0	0	0	0	0	0	85.46	0	0	0	0	0	0	0	0	0	0
D8_1	Bacteriastrum furcatum	85	0	0	0	0	0	0.85	0.85	0	0.85	0	0	5.1	0	0	0	0	0	0	0	0	0	0	0	0	0	0	0	0	0	0	0	0	0	0	0	0	0	0	0	0	0	0	0	0	0	0	0
D10	Centric (10-20µm diameter)	106	0	106	4.24	0	0	30.74	21.2	5.3	0	0	4.24	3.18	0	0	2.12	3.18	4.24	0	0	3.18	1.06	3.18	3.18	1.06	7.42	0	3.18	3.18	0	7.42	4.24	4.24	0	3.18	0	6.36	1.06	13.78	12.72	6.36	1.06	0	0	1.06	0	0	0
D12	Centric (20-30µm diameter)	261	73.08	20.88	93.96	0	99.18	0	18.27	13.05	23.49	10.44	5.22	2.61	15.66	2.61	5.22	15.66	10.44	0	13.05	0	0	2.61	0	0	5.22	0	2.61	7.83	0	2.61	7.83	0	0	13.05	5.22	15.66	7.83	0	0	10.44	18.27	0	0	0	0	7.83	0
D13	Centric (30-40µm diameter)	594.764	23.7906	23.7906	47.5812	11.8953	0	17.8429	17.8429	17.8429	11.8953	23.7906	11.8953	0	5.94764	0	0	0	0	0	0	0	0	0	0	11.8953	0	0	0	0	0	0	0	5.94764	0	5.94764	0	23.7906	11.8953	0	0	0	0	0	0	5.94764	0	0	0
D14	Centric (>40µm diameter)	2209	0	0	0	0	0	0	0	22.09	0	0	0	0	0	0	0	0	0	0	0	0	0	0	0	0	0	0	22.09	0	0	0	0	0	0	0	0	0	0	0	0	0	0	0	0	0	0	0	0
D19_1	Chaetoceros decipiens	566.876	258.72	0	0	0	0	0	0	0	0	0	0	0	0	0	0	0	0	0	0	0	0	0	0	0	0	0	0	0	0	0	0	0	0	0	0	0	0	0	0	0	0	0	0	0	0	0	0
D20	Chaetoceros spp. - Hyalochaete group	129.491	0	0	0	0	5.17965	0	2.58982	0	0	0	0	0	0	0	0	0	0	0	0	0	0	0	0	0	0	0	0	0	0	0	0	0	0	0	0	3.88474	0	0	0	11.6542	0	0	0	0	0	0	0
D21	Chaetoceros spp. - Phaeoceros group	501	50.1	0	0	0	0	0	0	0	0	0	0	0	0	0	0	0	0	0	0	0	0	0	0	0	0	0	0	0	0	0	0	0	0	0	0	0	0	5.01	0	25.05	0	0	0	0	0	0	0
D26	Corethron criophilum (inc. C. inerme)	521.7	0	0	0	0	0	0	0	0	0	0	0	0	0	0	0	0	0	0	0	0	0	0	0	0	0	0	0	0	0	0	0	0	0	0	0	15.651	0	0	0	0	0	0	0	0	0	0	0
D27	Coscinodiscus sp. (A)	14726.8	0	1178.15	0	294.537	0	0	0	0	0	0	0	0	0	0	0	0	0	0	0	0	0	0	0	0	0	0	0	0	0	0	0	0	0	0	0	0	294.537	1178.15	0	0	0	0	0	0	0	0	0
D52	Cylindrotheca closterium (N. longissima)	15.3341	0.613364	2.76014	0.920046	0	0	0.306682	0	0	0.306682	0	0	0	0	0	0	0	0	0	0	0.153341	0.920046	0	0	0	0.460023	0.766705	0.460023	0	0.613364	0	0.306682	0	0	0.153341	0	3.98687	1.07339	0	0	3.83353	0	0	0	0	0	0	0
D29	Dactyliosolen spp. (D. phuketensis)	668	0	0	0	0	0	0	0	0	0	0	0	0	0	0	0	0	0	0	0	0	0	0	0	0	0	0	0	0	0	0	0	0	0	0	0	0	0	0	0	0	0	0	0	0	0	0	0
D29_1	Dactyliosolen fragilissimus	430	0	0	0	0	0	0	0	0	0	0	0	0	0	0	0	0	0	0	0	0	0	0	0	0	0	0	0	0	0	0	0	0	0	0	0	0	0	0	0	80.044	0	0	0	0	0	0	0
D34_1	Eucampia antarctica	363	0	0	0	0	0	0	0	0	0	0	0	0	0	0	0	0	0	0	0	0	0	0	0	0	0	0	0	0	0	0	0	0	0	0	0	0	0	0	0	0	0	0	0	0	0	0	0
D34_3	Eucampia zodiacus f. cylindricornis	340	0	0	0	0	0	0	0	0	0	0	0	0	0	0	0	0	0	0	0	0	0	0	0	0	0	0	8.74764	0	0	0	0	0	0	0	0	0	0	0	0	1.74953	0	0	0	0	0	0	0
D38	Guinardia delicatula	236	0	0	0	0	0	0	0	0	0	0	0	0	0	0	0	0	0	0	0	0	0	0	0	0	0	0	0	0	0	0	0	0	0	0	0	0	0	0	0	0	0	0	0	0	0	0	0
D40	Guinardia striata	3650	0	0	0	0	0	0	0	0	0	0	0	0	0	0	0	0	0	0	0	0	0	0	0	0	0	0	73	0	0	0	0	0	0	0	0	0	0	0	0	474.5	0	0	0	0	0	0	0
D44_A	Lennoxia faveolata	42986	0	0	0	0	0	0	0	0	0	0	0	0	0	0	0	0	0	0	0	0	0	0	0	0	0	0	0	0	0	0	0	0	0	0	0	0	0	0	0	0	0	0	0	0	0	0	0
D45	Leptocylindricus danicus + minimus	50	0	0	0	0	0	0	0	0	0	0	0	0	0	0	0	0	0	0	0	0	0	0	0	0	0	0	0	0	0	0	0	0	0	0	0	0	0	0	0	0	0	0	0	0	0	0	0
D49	Navicula spp.	260.762	88.659	0	5.21524	5.21524	0	0	0	0	0	0	0	0	0	0	0	0	0	0	0	0	0	0	0	0	0	0	0	0	0	0	2.60762	0	0	0	0	0	0	0	0	0	0	0	0	0	0	0	0
D51_A	Nitzschia spp.	90.55	0	0	0	0	0	0	0	0	8.1495	0	49.8025	22.6375	9.9605	3.622	0	0.9055	1.811	1.811	0	0	27.165	0	1.811	0	0	0	0	0	0	0	1.811	0	0	5.433	0	0	0	0	0	10.866	0	0	0	0	0	0	0
D56	Pennate (10-40µm long)	733.718	190.767	176.092	102.721	0	0	102.721	73.3718	44.0231	22.0115	44.0231	0	110.058	7.33718	0	0	0	7.33718	0	0	102.721	44.0231	22.0115	0	36.6859	36.6859	14.6744	271.476	22.0115	29.3487	0	29.3487	7.33718	0	0	0	110.058	66.0346	102.721	22.0115	381.533	0	14.6744	22.0115	14.6744	0	22.0115	36.6859
D57	Pennate spp. (40-80µm long)	2486.94	5471.26	646.604	0	49.7388	49.7388	24.8694	49.7388	74.6081	0	99.4775	124.347	0	0	0	0	0	0	0	0	0	596.865	0	0	0	99.4775	0	49.7388	0	0	74.6081	24.8694	74.6081	0	49.7388	74.6081	2163.64	920.167	124.347	99.4775	397.91	0	0	0	0	0	0	0
D57_1	Pennate spp. (> 80µm long)	13129.4	10503.5	787.762	262.587	0	787.762	131.294	525.175	131.294	0	0	0	1706.82	0	0	0	0	0	0	0	0	1181.64	131.294	131.294	0	0	0	656.469	0	393.881	0	0	0	131.294	0	131.294	3544.93	1181.64	131.294	0	1575.52	131.294	0	0	0	0	0	0
D59	Planktoniella sol	316	0	0	0	0	0	0	0	0	0	0	0	0	0	0	0	0	0	0	0	0	0	0	0	0	0	0	0	0	0	0	0	0	0	0	0	0	0	0	0	0	0	0	0	0	0	0	0
D62	Proboscia alata	560.619	67.2743	0	0	0	0	11.2124	0	0	0	0	0	5.60619	0	0	0	0	0	0	0	0	0	0	0	0	0	5.60619	50.4557	0	0	0	11.2124	0	0	0	0	39.2433	11.2124	0	0	0	5.60619	0	0	0	0	0	0
D62_1	Proboscia indica	3219	64.38	0	0	0	0	32.19	0	32.19	32.19	0	0	0	0	0	0	0	0	0	0	0	0	0	0	0	0	0	0	0	0	0	0	0	0	0	0	0	0	0	0	225.33	0	0	0	0	0	0	0
D64_1	Pseudo-nitzschia spp. (P. delicatissima complex)	20	18.304	0	0	0	0	0	0	0	0	0	0	0	0	0	0	0	0	0	0	0	0	0	0	0	0	0	0	0	0	0	0	0	0	0	0	13.696	2.368	0.256	0	7.68	0	0	0	0	0	0	0
D64_2	Pseudo-nitzschia spp. (P. seriata complex)	200	704	0	0	0	0	0	0	0	0	0	0	0	0	0	0	0	0	0	0	0	0	0	0	0	0	0	0	0	0	0	0	0	0	0	0	236	18	0	0	110	0	0	0	0	0	0	0
D67	Rhizosolenia bergonii	2682	0	0	0	0	0	0	0	0	0	0	0	0	0	0	0	0	0	0	0	0	0	0	0	0	0	0	0	0	0	0	0	0	0	0	0	134.1	0	0	53.64	53.64	0	0	0	0	0	0	0
D71	Rhizosolenia imbricata	1149	0	45.96	0	0	0	0	0	0	0	0	0	0	0	0	0	0	0	0	0	0	0	0	0	0	0	0	0	0	0	0	0	0	0	0	0	218.31	0	0	0	11.49	0	0	0	0	0	0	0
D73	Rhizosolenia setigera + pungens	5709.5	0	0	0	0	0	0	0	0	0	57.095	0	0	0	0	0	0	0	0	0	0	57.095	0	0	0	0	0	0	0	0	0	0	0	0	0	0	570.95	0	0	0	57.095	0	0	0	0	0	0	0
D76	Unidentified Rhizosolenia spp.	15296.4	2447.42	0	0	0	0	0	0	0	0	0	0	0	0	0	0	0	0	0	0	0	0	0	0	0	0	0	0	0	0	0	0	0	0	152.964	0	764.818	0	0	0	0	0	0	0	0	0	0	0
D81	Thalassionema spp. (T. nitzschoides)	80	1.36	0	1.36	0	0	0	0	0	0	0	0	0	0	0	0	0	0	0	0	0	0	0	0	0	0	0	0	0	0	0	0	0	0	0	0	0	0	1.7	0	0.34	0	0	0	0	0	0	0
D82	Thalassiosira spp.	666	0	0	0	0	0	0	0	0	0	0	0	0	0	0	0	0	0	0	0	0	0	0	0	0	0	0	0	0	0	0	0	0	0	0	0	0	0	0	0	0	0	0	0	0	0	0	0
D82_A	Thalassiothrix spp.	421	564.14	16.84	0	8.42	0	0	0	0	0	0	0	0	0	0	0	0	0	0	0	0	0	0	0	0	0	4.21	29.47	0	0	0	0	0	8.42	0	0	231.55	147.35	0	0	33.68	0	0	0	0	0	0	0
D83	Thalassiothrix longissima	450	0	0	0	0	0	0	0	0	0	0	0	0	0	0	0	0	0	0	0	0	0	0	0	0	0	0	0	0	0	0	0	0	0	0	0	0	4.5	4.5	63	103.5	4.5	0	0	0	0	0	0
Ed5	Hemiaulus hauckii	141	0	0	0	0	0	0	0	0	14.1	5.64	5.64	9.87	4.23	1.41	2.82	5.64	1.41	4.23	0	0	0	0	7.05	0	2.82	0	129.72	0	0	0	0	2.82	0	1.41	0	0	0	0	0	0	0	0	0	0	0	0	0
Ed5_1	Hemiaulus indicus	270.594	0	0	0	0	0	0	0	0	0	0	0	0	0	0	0	0	0	0	0	0	0	0	0	0	0	0	232.711	0	0	0	0	0	0	0	0	0	0	0	0	0	0	0	0	0	0	0	0
Ed7	Hemiaulus sinensis	142	0	0	0	0	0	0	0	0	0	0	0	0	0	0	0	0	0	0	0	0	9.94	0	0	0	0	0	0	0	0	0	0	0	0	0	0	0	0	0	0	0	0	0	0	0	0	0	0
			0	0	0	0	0	0	0	0	0	0	0	0	0	0	0	0	0	0	0	0	0	0	0	0	0	0	0	0	0	0	0	0	0	0	0	0	0	0	0	0	0	0	0	0	0	0	0
	2. AUTOTROPHIC DINOFLAGELLATES		0	0	0	0	0	0	0	0	0	0	0	0	0	0	0	0	0	0	0	0	0	0	0	0	0	0	0	0	0	0	0	0	0	0	0	0	0	0	0	0	0	0	0	0	0	0	0
			0	0	0	0	0	0	0	0	0	0	0	0	0	0	0	0	0	0	0	0	0	0	0	0	0	0	0	0	0	0	0	0	0	0	0	0	0	0	0	0	0	0	0	0	0	0	0
Ad0	Achradina pulchra	665.42	0	13.3084	0	79.8504	0	0	0	0	26.6168	6.6542	13.3084	19.9626	46.5794	26.6168	19.9626	26.6168	33.271	13.3084	53.2336	13.3084	19.9626	39.9252	13.3084	53.2336	33.271	0	0	13.3084	0	6.6542	0	33.271	0	13.3084	6.6542	13.3084	0	39.9252	6.6542	0	0	0	0	0	0	0	13.3084
Ad0_1	Achradina sulcata	1015.97	0	0	0	0	0	0	0	0	0	0	0	0	0	0	0	0	0	0	40.6388	0	0	10.1597	0	0	0	0	0	0	0	0	0	0	0	0	0	0	0	0	0	0	0	0	0	0	0	0	0
Ad00	Alexandrium spp.	3210.2	513.632	706.244	128.408	0	0	32.102	0	0	32.102	0	0	0	32.102	64.204	64.204	160.51	64.204	128.408	353.122	192.612	128.408	96.306	256.816	160.51	160.51	0	224.714	0	0	0	160.51	96.306	32.102	0	0	0	0	0	642.04	160.51	0	96.306	32.102	0	353.122	96.306	192.612
Ad000	Amphidinium spp.	241	81.94	43.38	77.12	4.82	33.74	31.33	28.92	28.92	16.87	19.28	19.28	40.97	48.2	45.79	48.2	43.38	26.51	38.56	33.74	38.56	36.15	21.69	31.33	36.15	65.07	24.1	81.94	21.69	14.46	28.92	14.46	16.87	16.87	26.51	33.74	53.02	262.69	255.46	28.92	269.92	79.53	120.5	16.87	43.38	28.92	12.05	24.1
Ad000_1	Amphidinium sphenoides	303	33.36	22.24	0	11.12	22.24	0	0	5.56	8.34	11.12	0	8.34	8.34	33.36	13.9	2.78	13.9	0	5.56	5.56	0	11.12	0	2.78	8.34	0	0	11.12	0	5.56	0	0	0	0	0	25.02	0	5.56	0	0	5.56	2.78	13.9	2.78	11.12	0	0
Ad000_2	Amphidinium stigmatum	161.955	0	0	0	0	0	0	0	0	0	0	0	0	0	0	0	0	12.9564	0	22.6737	11.3369	14.576	14.576	3.23911	0	11.3369	0	0	0	0	0	0	0	0	0	0	1.61955	14.576	30.7715	1.61955	14.576	8.09777	14.576	4.85866	0	1.61955	0	9.71732
Ad2	Brachidinium capitatum	1526.14	0	0	0	0	0	0	0	0	0	0	0	0	0	0	0	0	0	0	0	0	0	0	0	0	0	0	0	0	0	0	0	0	0	0	0	0	0	0	0	0	0	15.2614	0	0	0	0	0
Ad2_A	Ceratium arietinum	4288	0	0	0	0	0	0	0	0	0	0	0	0	0	0	0	0	0	0	0	0	0	0	0	0	0	0	0	0	0	0	0	0	0	0	0	0	0	0	0	0	0	0	0	0	0	0	42.88
Ad3	Ceratium azoricum	1028	0	20.56	0	82.24	20.56	0	0	10.28	0	0	0	0	0	0	0	0	0	0	0	0	0	0	0	0	0	0	0	0	0	0	0	0	0	0	0	0	0	0	0	0	0	0	0	0	0	0	0
Ad3_1	Ceratium bigelowi	498.203	0	0	0	0	0	0	0	0	0	0	0	0	0	0	0	0	0	0	0	0	0	0	0	0	0	0	0	0	0	0	0	0	0	0	0	0	0	0	0	0	0	0	0	0	0	4.98203	0
Ad6	Ceratium carriense	4288	0	0	0	0	0	0	0	0	0	0	0	0	0	0	0	0	0	0	0	0	0	0	0	0	0	0	0	0	0	0	0	0	0	0	0	0	0	0	0	0	0	0	42.88	0	0	0	0
Ad7	Ceratium declinatum	4103	0	0	0	0	0	0	0	0	0	0	0	0	0	0	0	0	0	0	0	0	0	0	0	0	0	0	41.03	0	0	0	0	0	0	0	0	0	0	0	0	0	0	0	0	0	0	0	0
Ad7_1	Ceratium declinatum var. angusticornum	3184.96	0	0	0	0	0	0	0	0	0	0	0	0	0	0	0	0	0	0	0	0	0	0	31.8496	0	0	0	0	0	0	0	0	0	0	0	0	0	0	0	0	0	0	0	0	0	0	0	0
Ad8	Ceratium extensum	2116	0	0	0	42.32	0	0	63.48	0	0	0	21.16	0	0	0	0	0	0	0	0	0	0	0	0	0	0	0	0	21.16	0	0	0	0	0	0	0	0	0	0	0	0	0	0	0	0	0	0	0
Ad9	Ceratium furca	6175.05	0	378.7	541	486.9	0	27.05	135.25	27.05	0	0	0	0	0	0	0	0	0	0	0	0	0	0	0	0	0	0	0	0	0	0	0	0	0	0	0	0	0	54.1	0	0	0	0	0	0	0	0	0
Ad10	Ceratium fusus var. fusus	2257.3	0	0	0	28.9	57.8	14.45	0	0	0	0	0	28.9	0	0	0	0	0	0	0	0	0	0	0	0	0	0	0	0	0	0	0	0	0	0	0	0	0	0	0	43.35	14.45	0	0	0	0	0	0
Ad10_1	Ceratium fusus var. seta	2250.5	45.01	270.06	0	0	0	67.515	45.01	45.01	0	0	0	0	0	45.01	45.01	22.505	0	0	0	0	0	0	22.505	0	0	22.505	0	0	0	0	0	0	0	0	0	0	45.01	0	22.505	22.505	0	0	0	22.505	0	0	0
Ad10_2	Ceratium fusus var. schuettii	2862.91	0	0	0	0	0	0	0	0	0	0	0	0	0	0	0	0	0	0	0	28.6291	0	0	0	0	0	0	0	0	0	0	0	0	0	0	0	0	0	0	0	0	0	0	0	0	0	0	0
Ad12	Ceratium gibberum	8206	0	0	0	164.12	0	0	82.06	82.06	0	0	0	0	0	0	0	0	0	0	0	0	0	0	0	0	0	0	0	0	0	0	0	0	0	0	0	0	0	0	0	0	0	0	0	0	0	0	0
Ad14	Ceratium horridum	7742.96	0	122.24	61.12	122.24	0	0	213.92	15.28	0	30.56	0	0	0	0	0	0	0	0	0	0	0	0	0	0	0	0	0	0	0	0	0	0	0	0	0	0	0	0	0	0	0	0	0	0	0	0	0
Ad16	Ceratium limulus	39062	0	0	0	0	0	0	0	0	0	0	0	0	0	0	0	0	0	0	0	0	0	0	0	0	0	0	0	0	0	0	0	0	0	0	0	0	0	0	0	0	0	0	0	390.62	0	0	0
Ad17	Ceratium lineatum	2045.67	20.56	0	0	0	20.56	0	10.28	0	0	0	10.28	0	0	0	0	0	0	0	0	0	0	0	0	0	0	0	0	0	0	0	0	0	0	0	10.28	30.84	10.28	0	0	10.28	0	0	10.28	0	0	0	0
Ad19	Ceratium macroceros var. macroceros	5519	0	0	0	0	0	0	0	0	0	0	0	0	0	0	42.88	0	0	0	0	0	0	0	0	0	0	0	0	0	0	0	0	0	0	0	0	0	0	0	42.88	0	0	0	0	0	0	0	0
Ad19_1	Ceratium massiliense	4565	0	0	0	0	0	0	0	0	0	0	0	0	0	0	0	0	0	0	0	0	0	0	0	0	0	0	0	0	0	0	0	0	0	0	0	0	0	0	0	0	0	0	0	0	0	45.65	0
Ad21	Ceratium pentagonum	4565	0	0	0	0	0	0	0	0	0	0	0	0	0	0	0	0	0	0	0	0	0	0	0	0	0	0	0	0	0	0	0	0	0	0	0	0	0	0	0	0	0	0	20.56	0	0	0	0
Ad21_1	Ceratium pentagonum var. tenerum	7733.43	0	0	0	0	0	0	0	0	0	0	0	0	0	0	0	0	0	0	0	0	0	0	0	0	0	0	0	0	0	0	0	0	0	0	0	77.3343	0	0	0	0	309.337	0	0	232.003	0	0	0
Ad23	Ceratium pulchellum	23952	0	0	0	0	0	0	0	0	0	0	0	0	0	0	0	0	0	0	0	0	0	0	0	0	0	0	0	0	0	0	0	0	0	0	0	0	0	0	0	0	239.52	0	0	0	0	0	0
Ad23_1	Ceratium ranipes	10686	0	0	0	0	0	0	0	0	0	0	0	0	0	0	0	0	0	0	0	0	0	0	0	0	0	0	0	0	0	0	0	0	0	0	0	0	0	0	0	0	0	0	0	0	0	0	0
Ad26	Ceratium teres	1028	0	0	0	0	0	0	0	0	0	0	0	0	0	0	20.56	10.28	10.28	30.84	10.28	10.28	10.28	10.28	10.28	20.56	0	10.28	0	0	0	20.56	10.28	41.12	10.28	0	10.28	0	0	0	0	0	0	0	0	10.28	10.28	0	10.28
Ad28_1	Ceratium tripos var. atlanticum	958.963	0	19.1793	0	38.3585	0	0	0	0	0	0	0	0	0	0	0	0	0	0	0	0	0	0	0	0	0	0	0	0	0	0	0	0	0	0	0	0	0	19.1793	0	0	0	0	0	0	0	0	0
Ad30_1	Ceratocorys gourretii	3081	0	0	0	0	0	0	0	0	0	0	0	0	0	0	0	0	0	0	0	0	0	0	0	0	0	0	0	0	0	0	0	0	0	0	0	0	0	0	0	0	0	0	0	0	30.81	0	0
Ad30_2	Ceratocorys horrida	12008.6	0	0	0	0	0	0	0	120.086	120.086	120.086	0	0	0	0	0	0	0	0	0	0	0	0	0	0	0	0	0	0	0	0	0	0	0	0	120.086	0	0	0	0	0	0	0	0	0	0	0	0
Ad31	Cladopyxis brachiolata	283	0	0	0	0	0	0	0	0	0	0	0	0	0	0	2.83	2.83	0	0	0	0	0	0	0	0	0	0	0	0	0	0	0	0	0	0	0	0	0	0	0	0	0	0	0	0	0	0	0
Ad35	Goniodoma spp. (G. polyedricum)	1868	37.36	37.36	0	37.36	0	56.04	37.36	0	0	18.68	0	0	0	0	0	0	0	0	0	0	0	0	0	0	18.68	0	0	0	0	0	0	18.68	0	0	0	0	0	0	0	0	18.68	0	37.36	0	0	0	0
Ad35_1	Goniodoma sphaericum	7628.22	0	0	0	0	0	0	76.2822	0	76.2822	0	0	0	0	0	0	0	0	0	0	0	0	0	0	152.564	0	0	0	0	0	0	0	0	0	0	0	0	0	0	0	0	0	0	0	0	0	0	0
Ad35_2	Gonyaulax birostris	1278.22	0	0	0	0	0	0	0	0	0	0	0	0	0	0	0	0	0	0	0	0	0	0	0	0	0	0	0	0	0	0	0	0	0	0	0	0	0	0	0	0	0	0	0	12.7822	0	0	0
Ad35_3	Gonyaulax digitale	3091	0	0	0	0	0	0	0	0	30.91	0	0	0	0	0	0	0	0	0	0	0	0	0	0	0	0	0	0	0	0	0	0	0	0	0	0	0	0	0	0	0	0	0	0	0	0	0	0
Ad37	Gonyaulax polygramma	4505	0	270.3	0	0	0	0	90.1	0	0	0	0	0	0	0	0	0	0	0	0	0	0	0	0	0	0	0	0	0	0	0	0	0	0	0	0	0	0	0	0	0	0	0	0	0	0	0	0
Ad38	Gonyaulax spinifera	2097.14	0	1080.54	0	0	0	0	120.06	80.04	20.01	20.01	20.01	0	0	0	20.01	20.01	20.01	0	0	20.01	0	20.01	20.01	0	0	0	20.01	0	0	0	0	20.01	0	0	0	0	0	0	0	0	0	0	0	0	20.01	0	0
Ad39	Gonyaulax spp.	3123.71	0	0	0	0	0	0	0	0	0	0	0	0	0	0	0	31.2371	0	31.2371	93.7114	0	0	0	93.7114	0	31.2371	0	0	0	124.949	31.2371	93.7114	124.949	62.4743	93.7114	187.423	0	0	0	31.2371	0	31.2371	31.2371	0	0	62.4743	0	0
AD39_A	Gymnodinum spp.	1550.9	341.199	248.145	0	155.09	465.271	124.072	77.5452	62.0362	139.581	0	31.0181	0	15.509	62.0362	62.0362	93.0543	77.5452	62.0362	0	139.581	186.109	0	356.708	325.69	155.09	0	248.145	186.109	108.563	170.6	201.618	170.6	46.5271	0	77.5452	155.09	93.0543	170.6	217.127	108.563	124.072	77.5452	62.0362	0	15.509	15.509	0
Ad40_1	Gymnodinium coeruleum	13272.2	0	0	0	0	0	0	0	0	0	0	0	0	0	0	0	0	0	0	0	0	0	0	0	0	0	0	0	0	0	0	0	0	0	0	0	0	0	0	0	0	0	0	0	0	0	0	132.722
Ad41_A	Gyrodinium spp.	1824	583.68	364.8	0	474.24	0	91.2	18.24	18.24	18.24	0	54.72	54.72	36.48	0	18.24	72.96	72.96	109.44	291.84	182.4	237.12	18.24	218.88	255.36	255.36	127.68	109.44	182.4	54.72	164.16	91.2	164.16	36.48	91.2	18.24	164.16	164.16	91.2	273.6	328.32	182.4	91.2	91.2	54.72	109.44	72.96	54.72
Ad41_A1	Gyrodinium britannicum	3840	0	153.6	0	0	0	0	0	38.4	0	0	0	0	0	0	0	0	0	0	0	0	0	0	0	0	0	0	0	0	0	0	0	0	0	0	0	0	0	0	0	0	0	0	0	0	0	0	0
Ad41_B	Heterocapsa spp.	219.102	1.89667	0	0	22.76	0	0.948333	0.948333	2.845	0	0	0	0	0.948333	0	0	0	6.63833	0.948333	0	0	0	0	0	0	0	0	6.63833	0	0	0	0	0	0	0	0	0	0	0	0.948333	0	0	0	0	0	0.948333	0	0
Ad41_B1	Heterocapsa triquetra	270.063	32.4076	70.2164	0	0	0	0	0	0	0	0	8.10189	5.40126	0	0	0	0	2.70063	0	0	0	0	0	0	0	0	0	0	0	0	0	0	0	0	0	0	0	0	0	0	0	0	0	0	0	0	0	0
Ad41_C	Karenia spp. (< 20 µm)	680	27.2	122.4	40.8	68	0	27.2	6.8	95.2	13.6	0	54.4	61.2	108.8	81.6	176.8	122.4	170	190.4	285.6	380.8	231.2	183.6	244.8	217.6	333.2	54.4	244.8	129.2	68	156.4	149.6	333.2	136	122.4	149.6	0	0	0	95.2	210.8	129.2	170	47.6	129.2	81.6	34	6.8
Ad41_C1	Karenia spp. (> 20 µm)	1379	27.58	0	27.58	0	165.48	0	0	27.58	0	0	0	0	0	13.79	13.79	0	0	0	0	0	0	0	0	82.74	0	0	0	0	0	0	0	0	0	0	0	220.64	413.7	220.64	137.9	206.85	165.48	165.48	124.11	303.38	344.75	151.69	303.38
Ad41_C2	Karenia brevis	904.727	0	0	0	0	0	0	0	0	0	0	0	0	0	0	0	0	0	0	18.0945	0	0	0	0	0	0	0	0	0	0	0	0	0	0	0	0	0	0	0	0	0	0	9.04727	0	0	0	0	0
Ad41_C3	Karenia bicuneiformis	1885	0	0	0	0	0	0	0	0	0	0	0	0	0	0	0	0	0	0	0	0	0	0	37.7	37.7	0	0	0	0	0	0	0	0	0	0	18.85	0	18.85	37.7	0	0	0	0	0	0	0	0	0
Ad41_C4	Karenia mikimotoi	810	0	0	0	0	0	0	0	0	0	0	0	0	0	0	0	40.5	0	16.2	0	0	0	40.5	16.2	0	0	0	0	0	0	0	0	0	0	0	0	0	0	0	0	0	0	0	24.3	16.2	40.5	40.5	8.1
Ad41_C5	Karenia papilionacea	1916	0	0	0	0	0	0	0	0	0	0	0	0	0	0	0	0	0	0	0	0	0	0	0	57.48	95.8	0	0	0	0	0	0	0	0	0	0	0	0	0	0	0	38.32	0	0	38.32	0	38.32	0
Ad41_D	Katodinium glaucum	533	0	29.6482	19.7654	0	9.88272	9.88272	4.94136	14.8241	9.88272	4.94136	0	4.94136	4.94136	0	9.88272	0	9.88272	4.94136	4.94136	19.7654	0	4.94136	9.88272	9.88272	9.88272	14.8241	44.4722	34.5895	9.88272	9.88272	0	9.88272	0	4.94136	4.94136	19.7654	4.94136	4.94136	9.88272	19.7654	4.94136	9.88272	9.88272	0	4.94136	0	0
Ad41_F	Lessardia elongata	166	16.6	23.24	13.28	0	6.64	3.32	8.3	0	0	0	4.98	18.26	16.6	1.66	0	0	0	0	19.92	11.62	26.56	14.94	16.6	0	28.22	9.96	46.48	38.18	11.62	18.26	28.22	26.56	8.3	36.52	6.64	21.58	39.84	13.28	11.62	36.52	9.96	0	8.3	0	14.94	8.3	4.98
Ad41_G	Lingulodinium polyedrum	4949	0	0	0	0	558.108	0	62.012	155.03	93.018	0	0	0	0	0	0	0	0	0	0	31.006	0	0	0	0	0	0	0	0	0	0	0	31.006	0	0	0	0	0	0	0	0	0	0	0	0	0	0	0
Ad43_A1	Oxytoxum adriaticum	108.132	0	0	0	0	0	0	0	0	0	0	0	0	1.08132	0	0	0	0	0	0	0	0	0	0	0	0	0	0	0	0	0	0	0	0	0	0	0	0	0	0	0	0	0	0	0	0	0	0
Ad43_A2	Oxytoxum caudatum	257.137	0	0	0	0	0	0	0	0	0	0	0	0	0	0	0	0	0	0	0	0	0	0	0	0	0	0	0	0	0	0	0	0	0	0	0	0	2.57137	2.57137	0	0	0	0	0	0	0	0	0
Ad43_A3	Oxytoxum coronatum	180.157	0	0	0	0	0	0	0	0	0	0	3.60314	0	0	0	0	0	1.80157	0	1.80157	0	3.60314	9.00785	0	0	0	0	0	0	0	0	0	0	0	0	0	0	0	0	0	5.40471	0	0	0	0	0	0	1.80157
Ad43_A4	Oxytoxum crassum	130.846	0	0	0	0	0	0	0	0	0	0	0	0	0	3.92539	5.23386	0	1.30846	3.92539	2.61693	0	0	0	0	1.30846	0	0	0	1.30846	0	0	0	0	0	1.30846	1.30846	0	0	3.92539	5.23386	1.30846	0	0	0	0	2.61693	0	2.61693
Ad43_A5	Oxytoxum curvatum	605.463	0	0	0	0	0	0	0	0	0	0	0	0	0	0	0	0	0	0	0	0	0	0	0	0	0	0	0	0	0	0	0	0	0	0	0	0	0	0	0	6.05463	0	0	0	0	0	0	0
Ad43_A6	Oxytoxum gracile	158	31.6	6.32	0	0	0	0	0	0	0	0	0	0	0	6.32	0	0	4.74	0	4.74	7.9	9.48	9.48	4.74	0	7.9	0	0	0	0	0	0	0	0	0	0	0	0	0	7.9	37.92	0	1.58	3.16	0	0	0	0
Ad43_A7	Oxytoxum globosum	188.428	0	0	0	0	0	0	0	0	0	0	0	0	0	0	5.65283	9.42138	26.3799	0	9.42138	3.76855	0	7.5371	1.88428	0	0	0	0	7.5371	0	0	0	0	0	0	3.76855	0	0	0	0	3.76855	0	0	0	0	1.88428	1.88428	3.76855
Ad44	Oxytoxum milneri	254	0	0	0	0	0	0	0	0	0	0	0	0	2.54	0	0	0	0	0	0	0	0	0	0	0	0	0	0	0	0	0	0	0	0	0	0	0	0	0	0	0	0	0	0	0	0	0	0
Ad44_1	Oxytoxum laticeps	197.581	0	19.7581	7.90326	0	3.95163	1.97581	0	0	0	0	0	3.95163	0	3.95163	15.8065	9.87907	3.95163	5.92744	13.8307	11.8549	11.8549	7.90326	3.95163	15.8065	7.90326	5.92744	15.8065	7.90326	0	1.97581	3.95163	5.92744	1.97581	0	7.90326	1.97581	1.97581	1.97581	3.95163	9.87907	0	0	5.92744	1.97581	11.8549	7.90326	1.97581
Ad44_2	Oxytoxum longiceps	646.011	38.7606	0	0	0	0	0	0	0	0	0	0	6.46011	0	0	0	0	0	0	0	0	0	0	0	0	0	0	0	0	0	0	0	0	0	0	0	0	0	0	0	0	0	0	0	0	0	0	0
Ad45	Oxytoxum scolopax	148	0	44.4	0	5.92	8.88	2.96	1.48	5.92	0	0	0	1.48	0	0	1.48	0	0	0	0	0	0	0	0	0	0	0	0	0	0	0	0	0	0	0	1.48	0	0	1.48	0	1.48	0	0	0	0	1.48	0	0
Ad45_1	Oxytoxum spectrum	151.52	0	0	0	0	0	0	0	0	0	0	0	0	0	1.5152	0	0	0	0	3.03041	1.5152	0	3.03041	3.03041	0	1.5152	1.5152	0	1.5152	0	1.5152	3.03041	0	0	1.5152	4.54561	0	0	1.5152	0	0	0	0	0	3.03041	0	1.5152	1.5152
Ad46	Oxytoxum sphaeroideum	119.216	0	0	0	0	0	0	0	0	0	0	0	0	0	0	0	0	0	0	0	0	0	0	0	0	0	0	0	0	0	0	0	0	0	0	1.19216	0	0	0	0	0	0	0	0	0	0	0	0
Ad46_1	Oxytoxum variable	77	0	0	0	0	0	0	0	0	0	0	0	0	0	0	0	0	0	0	0	0	0	0	0	0	0	0	1.54	0.77	0	0	0	0	0	0	0	0	0	0	0	0	0	0	0	0	0	0	0
Ad47	Oxytoxum spp.	171	6.84	0	6.84	3.42	0	1.71	5.13	5.13	0	0	0	3.42	22.23	1.71	13.68	1.71	0	1.71	0	0	0	6.84	0	1.71	0	3.42	0	1.71	0	1.71	3.42	1.71	5.13	1.71	3.42	8.55	18.81	20.52	0	51.3	0	1.71	0	3.42	1.71	6.84	5.13
Ad48_1	Paleophalachroma unisectum	978.245	0	0	0	0	0	0	0	0	0	0	0	0	0	0	0	0	0	0	0	0	0	0	0	0	29.3474	0	0	0	0	0	0	0	0	0	0	9.78245	0	0	0	0	0	0	0	0	0	0	0
Ad49	Phalacroma rotundatum	3241.19	64.8237	0	64.8237	0	0	0	32.4119	0	0	32.4119	32.4119	162.059	0	0	0	0	64.8237	0	0	0	0	0	32.4119	0	0	0	0	0	0	0	0	0	0	0	0	0	32.4119	0	0	0	0	0	0	0	0	0	0
Ad49_A1	Prorocentrum dactylus	6194	0	0	0	0	0	0	0	0	123.88	0	61.94	433.58	61.94	0	0	0	0	0	0	0	0	0	0	0	0	0	0	0	0	0	0	0	0	0	0	0	0	0	0	61.94	0	0	0	0	0	0	0
Ad50	Prorocentrum dentatum	24	4.8	0	0	0	0	0	0	0	0	0	0	0	0	0	0	0	0	0	0	0	0	0	0	0	0	0	0	0	0	0	0	0	0	0	0	0	0.72	0	0	0	0	0	0	0	0	0	0
Ad50_1	Prorocentrum gracile	629	0	0	0	0	0	0	0	0	0	0	0	0	0	0	0	0	0	0	0	0	0	0	0	0	0	0	6.29	0	0	0	6.29	6.29	6.29	0	0	0	0	0	6.29	0	0	0	0	0	0	0	6.29
Ad51	Prorocentrum magnum	209	0	0	0	0	0	0	0	0	0	0	0	0	0	0	0	0	0	0	0	0	0	0	0	0	0	0	2.09	0	0	0	0	0	0	0	0	0	0	0	0	0	0	0	0	0	0	0	0
Ad52	Prorocentrum rostratum	1051	0	0	0	0	0	0	0	0	0	0	0	0	0	0	0	0	0	0	0	63.06	0	10.51	10.51	0	0	21.02	10.51	10.51	42.04	21.02	10.51	0	10.51	0	0	0	0	0	0	0	10.51	0	0	0	0	0	0
Ad53	Prorocentrum spp. Small (P. cordatum)	151	6.04	0	0	114.76	262.74	273.31	363.91	132.88	0	0	0	0	0	0	0	0	0	0	0	0	0	0	0	0	0	0	1.51	0	0	0	0	0	0	0	0	0	0	0	0	0	0	0	0	0	0	0	0
Ad54	Prorocentrum spp. Medium (P. compressum)	934	18.68	317.56	130.76	130.76	130.76	37.36	158.78	74.72	18.68	9.34	9.34	37.36	0	0	0	0	0	9.34	37.36	0	9.34	28.02	0	37.36	18.68	9.34	18.68	18.68	9.34	0	9.34	9.34	0	0	18.68	9.34	0	0	65.38	37.36	74.72	9.34	9.34	9.34	28.02	9.34	18.68
Ad55	Prorocentrum vaginula	1051	0	0	0	0	0	0	0	0	0	0	0	0	0	0	0	0	0	0	0	0	0	0	0	0	0	0	0	0	0	0	0	0	0	0	0	0	0	0	0	0	0	0	0	0	0	0	0
Ad59_1	Scrippsiella / Pentapharsodinium / Ensiculifera spp.	344.87	13.7948	0	20.6922	6.8974	13.7948	6.8974	3.4487	0	0	0	3.4487	6.8974	34.487	24.1409	34.487	34.487	0	37.9357	51.7305	75.8714	48.2818	41.3844	27.5896	37.9357	34.487	31.0383	27.5896	51.7305	137.948	20.6922	413.844	24.1409	34.487	0	6.8974	0	17.2435	0	51.7305	27.5896	13.7948	55.1792	17.2435	17.2435	13.7948	24.1409	27.5896
Ad60	Torodinium spp. (T. teredo)	680	0	0	0	0	0	0	0	0	0	0	0	0	0	0	0	0	0	0	0	13.6	0	0	0	0	0	0	0	0	0	0	0	0	0	0	0	0	0	0	0	0	0	0	0	0	0	0	0
Ad60_1	Torodinium robustum	622	149.28	62.2	111.96	74.64	62.2	18.66	68.42	6.22	12.44	6.22	18.66	31.1	62.2	6.22	12.44	68.42	0	0	0	24.88	55.98	24.88	18.66	6.22	43.54	12.44	18.66	0	0	0	12.44	0	12.44	24.88	6.22	0	6.22	18.66	24.88	31.1	31.1	31.1	31.1	18.66	18.66	12.44	12.44
Ad60_2	Torodinium robustum small	311	6.22	12.44	0	0	0	0	0	0	0	0	0	0	0	27.99	15.55	0	0	21.77	0	15.55	0	31.1	0	0	0	0	0	0	0	0	0	0	0	0	0	49.76	143.06	220.81	24.88	71.53	9.33	6.22	9.33	15.55	12.44	3.11	15.55
Msc20	Medium (>10um) athecate dinoflagellates	1101.98	991.781	3636.53	793.425	1124.02	903.623	374.673	550.99	418.752	275.495	341.614	88.1583	407.732	661.188	286.515	650.168	385.693	528.95	429.772	881.583	826.484	716.286	562.009	683.227	1179.12	1355.43	297.534	374.673	782.405	330.594	672.207	914.643	738.326	462.831	407.732	451.811	495.891	495.891	352.633	341.614	473.851	319.574	352.633	176.317	264.475	275.495	253.455	363.653
Ed8_1	Histioneis inclinata	186.783	0	0	0	0	0	0	0	0	0	0	0	0	0	10.9	0	0	0	0	0	0	0	0	10.9	0	0	0	0	0	0	0	0	0	0	0	0	0	0	0	0	0	0	0	0	0	0	0	0
Ed8_2	Histioneis oxypteris	527.147	0	0	0	0	0	0	0	0	0	0	0	0	0	0	0	0	0	0	0	0	0	0	0	0	0	0	0	0	0	0	0	0	0	0	0	0	0	0	0	0	0	0	0	0	0	0	0
Ed10	Ornithocercus spp. (O. magnificus)	1804.13	0	0	0	0	0	0	0	0	0	0	0	0	0	0	0	0	0	0	0	0	0	0	0	0	0	0	0	0	0	0	0	150.45	0	0	150.45	0	0	0	0	0	0	0	0	0	0	0	0
			0	0	0	0	0	0	0	0	0	0	0	0	0	0	0	0	0	0	0	0	0	0	0	0	0	0	0	0	0	0	0	0	0	0	0	0	0	0	0	0	0	0	0	0	0	0	0
	3. HETEROTROPHIC DINOFLAGELLATES		0	0	0	0	0	0	0	0	0	0	0	0	0	0	0	0	0	0	0	0	0	0	0	0	0	0	0	0	0	0	0	0	0	0	0	0	0	0	0	0	0	0	0	0	0	0	0
			0	0	0	0	0	0	0	0	0	0	0	0	0	0	0	0	0	0	0	0	0	0	0	0	0	0	0	0	0	0	0	0	0	0	0	0	0	0	0	0	0	0	0	0	0	0	0
MZ1_1	Azadinium caudatum var. caudatum	575	0	46	0	0	0	0	0	0	0	0	0	0	0	0	0	0	0	0	0	0	0	0	0	0	5.75	0	0	0	0	0	0	0	0	0	0	0	0	0	0	0	0	0	0	0	0	0	0
MZ1_2	Azadinium caudatum var. margalefii	1686.21	0	33.7242	0	0	0	0	33.7242	0	0	0	16.8621	0	0	0	0	0	0	0	0	33.7242	0	0	0	0	0	0	0	0	0	0	0	0	0	0	0	0	0	0	0	0	0	0	0	0	0	0	0
MZ2	Blepharocysta spp.	2965	0	0	0	0	0	0	88.95	0	0	0	0	0	0	0	59.3	0	59.3	0	29.65	0	59.3	29.65	0	29.65	0	0	0	0	0	29.65	0	0	0	0	0	0	0	0	0	0	0	0	0	0	0	0	0
MZ2_1	Blepharocysta splendor-maris	3481.76	0	0	0	0	0	0	0	0	0	0	0	0	0	0	0	0	0	0	0	0	0	0	0	0	0	0	0	0	0	0	34.8176	0	0	0	0	0	0	0	0	0	0	0	0	0	0	0	0
MZ3	Cochlodinium spp.	371	0	0	0	0	0	0	0	0	0	0	0	0	0	0	0	0	0	3.71	0	0	0	0	37.1	51.94	40.81	7.42	14.84	33.39	7.42	7.42	0	18.55	7.42	22.26	7.42	40.81	7.42	25.97	44.52	40.81	40.81	25.97	18.55	3.71	25.97	11.13	14.84
MZ3_1	Cochlodinium angustum	5469.37	0	0	0	0	0	0	0	0	0	0	0	0	0	0	0	0	0	0	0	164.081	0	0	0	0	0	0	0	0	0	0	0	0	0	0	0	0	0	0	0	0	0	0	0	0	0	0	0
MZ3_2	Cochlodinium catenatum	314.465	0	0	0	0	0	0	0	0	0	0	0	0	6.28929	0	0	0	0	0	0	0	0	0	0	0	0	0	0	0	0	0	0	0	0	0	0	0	0	0	0	0	0	0	0	0	0	0	0
MZ3_3	Cochlodinium helix	2908.13	0	174.488	232.651	116.325	58.1626	0	0	0	174.488	87.2439	203.569	87.2439	0	0	0	0	0	0	0	29.0813	58.1626	29.0813	0	0	0	0	0	0	0	0	0	0	0	0	0	0	0	0	0	29.0813	116.325	174.488	58.1626	58.1626	29.0813	87.2439	0
MZ3_4	Cochlodinium lebourae	4107.18	0	0	0	0	0	0	0	0	0	0	0	0	0	82.1436	0	0	0	0	0	0	0	41.0718	0	0	0	0	0	0	0	0	0	0	0	0	0	0	0	0	0	0	0	0	0	0	0	0	0
MZ3_5	Cochlodinium pulchellum	1054.26	0	0	0	42.1704	0	0	0	0	0	0	0	0	0	10.5426	10.5426	10.5426	0	0	0	31.6278	0	0	0	0	0	0	0	0	0	0	0	0	0	0	0	0	0	0	0	0	0	0	0	0	0	0	0
MZ4	Corythodinium spp. (C. tesselatum)	998	0	0	0	0	0	0	0	0	0	0	0	0	0	0	0	0	0	9.98	0	0	0	0	0	0	0	0	0	0	0	0	0	0	0	9.98	0	0	0	0	9.98	0	0	0	0	0	9.98	0	0
MZ4_1	Corythodinium constrictum	1723.79	0	0	0	0	0	0	0	0	0	0	17.2379	0	0	17.2379	0	0	0	0	0	0	0	0	0	0	0	0	0	0	0	0	0	0	0	0	0	0	0	0	0	0	0	0	0	0	0	0	0
MZ6	Dinophysis exigua	354.864	0	0	0	0	0	3.54864	0	0	0	0	0	0	0	0	3.54864	0	0	0	0	0	0	3.54864	0	0	0	0	0	0	0	0	0	0	0	0	0	0	0	0	0	0	0	0	3.54864	0	7.09728	0	0
MZ10_1	Dinophysis rotundata	3437	68.74	137.48	68.74	0	0	0	0	34.37	68.74	0	0	0	103.11	0	0	0	0	0	68.74	0	68.74	0	34.37	171.85	0	0	0	0	0	68.74	0	103.11	68.74	0	0	34.37	0	0	0	0	0	34.37	0	0	0	0	34.37
MZ12	Diplopsalopsis spp.	3302	0	0	0	132.08	0	0	0	0	0	0	0	0	0	0	0	0	0	0	0	0	0	0	0	0	0	0	0	0	0	0	0	0	0	0	0	0	0	0	0	0	0	0	0	0	0	0	0
MZ13_1	Erythropsidinium agile	4522.17	0	0	0	0	0	0	45.2217	0	45.2217	0	0	0	0	0	0	90.4435	0	0	0	0	0	0	45.2217	0	0	0	90.4435	0	0	0	0	0	0	0	0	90.4435	45.2217	0	45.2217	0	0	0	0	0	0	0	0
MZ15_1	Kofoidinium pavillardii	52990.6	0	0	0	0	0	0	0	0	0	0	0	0	0	0	0	0	0	529.906	0	529.906	0	0	0	0	0	0	0	0	0	0	0	0	0	0	0	0	0	0	0	0	0	0	0	0	0	0	0
MZ15_2	Nematodinium torpedo	2861.9	343.429	0	0	0	0	0	0	0	0	0	0	0	0	0	0	0	0	0	0	0	0	0	0	0	0	0	0	0	0	0	0	0	0	0	0	0	0	0	0	0	0	0	0	0	0	0	0
MZ18	Podolampas elegans	283	0	0	0	0	0	0	0	0	0	0	0	0	0	0	0	0	0	0	0	0	0	0	2.83	0	0	0	2.83	0	0	0	0	8.49	0	0	0	0	0	0	0	0	0	0	0	0	0	0	0
MZ19	Podolampas palmipes	283	0	0	5.66	0	11.32	0	0	0	0	0	0	0	2.83	0	0	0	0	0	0	0	0	0	0	0	2.83	0	0	0	0	0	0	0	2.83	0	0	0	0	0	0	0	2.83	2.83	2.83	0	2.83	0	2.83
MZ20	Podolampas spinifera	242.368	0	0	0	0	0	0	0	0	0	0	0	0	0	0	0	0	0	0	0	0	0	0	2.42368	0	0	0	2.42368	2.42368	0	0	0	2.42368	0	0	0	0	0	0	2.42368	2.42368	0	0	0	0	0	0	0
MZ20_1	Preperidinium meunieri	75	0	1.5	0	1.5	0	0	0	0	0	0	0	0	0	0	0	0	0	0	0	0	0	0	0	0	0	0	0	0	0	0	0	0	0	0	0	0	0	0	0	0	0	0	0	0	0	0	0
MZ21	Pronoctiluca spp. (P. pelagica / acuta)	173	0	3.46	0	0	0	0	0	0	1.73	0	0	0	0	0	0	0	1.73	0	1.73	1.73	1.73	0	0	0	5.19	1.73	3.46	1.73	3.46	0	1.73	0	0	1.73	0	1.73	0	0	0	0	0	0	0	0	0	0	0
MZ23	Protoperidinium spp. Small (P. bipes forms)	1775	0	0	0	0	0	0	0	0	0	0	0	0	0	0	0	0	0	0	0	0	0	0	0	0	0	0	0	0	0	0	0	0	0	0	0	0	0	0	0	0	0	0	0	0	0	0	0
MZ24	Protoperidinium spp. Medium	588	0	0	0	0	0	0	0	0	0	0	0	0	0	0	0	0	0	0	0	0	0	0	0	0	0	0	5.88	0	0	0	0	5.88	23.52	0	0	5.88	0	0	0	0	11.76	0	0	0	0	0	5.88
MZ24_1	Protoperidinium claudicans	9437	0	0	0	0	188.74	0	0	0	0	0	0	0	0	0	0	0	0	0	0	0	0	0	0	0	0	0	0	0	0	0	0	0	0	0	0	0	0	0	0	0	0	0	0	0	0	0	0
MZ25_1	Protoperidinium divergens	11095	0	1109.5	0	443.8	221.9	0	110.95	0	0	221.9	0	0	0	0	0	0	0	0	0	0	0	0	0	0	0	0	0	0	0	0	0	0	0	0	0	0	0	0	0	0	0	0	0	0	0	0	0
MZ25_2	Protoperidinium globulus	11503	0	0	0	0	0	0	0	0	0	0	0	0	0	0	0	0	0	0	0	0	0	0	0	0	0	0	0	0	26.19	0	0	0	0	0	0	0	0	0	0	0	26.19	0	0	0	0	0	0
MZ27	Protoperidinium spp. (P. cerasus / minutum forms)	2667	0	0	0	106.68	106.68	80.01	0	0	26.67	0	0	0	0	0	26.67	0	0	0	0	26.67	0	26.67	0	0	0	26.67	0	0	0	0	0	0	0	0	0	0	0	0	0	0	0	0	0	0	0	0	0
MZ28	Protoperidinium spp. (P. steinii forms)	1582	10.12	30.36	0	10.12	10.12	0	0	5.06	5.06	10.12	5.06	5.06	0	0	0	5.06	0	0	0	0	0	0	0	0	0	0	0	0	0	0	5.06	0	0	0	0	5.06	0	0	10.12	0	0	0	0	0	0	0	0
MZ29	Ptychodiscus spp. (P. noctiluca)	3235	64.7	388.2	0	64.7	0	0	0	0	0	0	0	0	0	0	0	0	0	0	0	0	0	0	0	0	0	0	0	0	0	0	0	0	0	0	0	0	0	0	0	0	0	0	0	0	0	0	0
MZ29_A	Spatulodinium pseudonoctiluca	1213	0	0	0	0	0	0	0	0	0	0	0	0	0	0	0	0	0	0	0	0	24.26	0	0	0	0	0	0	0	0	0	0	0	0	0	0	0	0	0	0	0	0	0	0	0	0	0	0
			0	0	0	0	0	0	0	0	0	0	0	0	0	0	0	0	0	0	0	0	0	0	0	0	0	0	0	0	0	0	0	0	0	0	0	0	0	0	0	0	0	0	0	0	0	0	0
	4. CYANOBACTERIA		0	0	0	0	0	0	0	0	0	0	0	0	0	0	0	0	0	0	0	0	0	0	0	0	0	0	0	0	0	0	0	0	0	0	0	0	0	0	0	0	0	0	0	0	0	0	0
			0	0	0	0	0	0	0	0	0	0	0	0	0	0	0	0	0	0	0	0	0	0	0	0	0	0	0	0	0	0	0	0	0	0	0	0	0	0	0	0	0	0	0	0	0	0	0
Cy1	Oscillatoria spp.	19	0	0	0	0	0	0	0	0	0	0	0	0	0	0	0	0	0	0	0	57.0304	3.1616	26.144	0	0	0	0	29.184	0	32.4672	0	136.792	0	0	0	0	0	0	0	0	0	0	0	0	0	0	0	0
Cy2	Oscillatoria limosa	1184.06	0	0	0	0	0	0	0	0	0	0	0	0	0	0	0	0	0	0	0	0	0	0	0	0	1027.77	1889.76	1060.92	0	0	0	0	0	0	0	0	0	0	0	0	0	0	0	0	0	0	0	0
Cy3	Oscillatoria tenuis var. tenuis	19.1696	0	0	0	0	0	0	0	0	0	0	0	0	0	0	0	0	0	0	0	0	0	0	0	0	64.8698	0	0	0	0	0	4.60069	21.1632	0	0	0	0	0	0	0	0	0	0	0	0	0	0	0
Cy4	Planktothrix agardhii	202.78	0	0	0	0	0	0	0	0	0	0	0	0	0	0	0	0	0	0	0	0	0	0	0	0	0	537.124	34.067	0	24.9825	0	0	0	0	0	0	0	0	0	0	0	0	0	0	0	0	0	0
Ed12_1	Trichodesmium erythraeum	17.0988	0	0	0	0	0	0	0	0	0	0	0	0	0	0	4.26787	0	0	0	9.64375	577.147	77.8886	73.6481	31.3524	20.1082	108.995	332.894	162.179	0	0	260.258	57.6163	0	94.4677	0	0	0	0	0	0	0	0	0	0	0	0	0	0
			0	0	0	0	0	0	0	0	0	0	0	0	0	0	0	0	0	0	0	0	0	0	0	0	0	0	0	0	0	0	0	0	0	0	0	0	0	0	0	0	0	0	0	0	0	0	0
	5. PRASINOPHYCEAE		0	0	0	0	0	0	0	0	0	0	0	0	0	0	0	0	0	0	0	0	0	0	0	0	0	0	0	0	0	0	0	0	0	0	0	0	0	0	0	0	0	0	0	0	0	0	0
			0	0	0	0	0	0	0	0	0	0	0	0	0	0	0	0	0	0	0	0	0	0	0	0	0	0	0	0	0	0	0	0	0	0	0	0	0	0	0	0	0	0	0	0	0	0	0
Msc15	Pterosperma spp.	298.286	0	0	5.96571	29.8286	65.6229	14.9143	5.96571	0	0	14.9143	0	0	0	0	0	11.9314	0	0	0	0	0	0	0	0	8.94857	0	0	0	0	0	0	0	0	0	0	0	0	0	0	0	0	0	0	0	0	0	0
Msc15_1	Pterosperma cristatum	241	0	4.82	0	0	0	14.46	7.23	2.41	0	7.23	0	0	0	0	0	0	0	0	0	0	0	0	0	0	0	0	0	0	0	0	0	0	0	0	0	0	0	0	0	0	0	0	0	0	0	0	0
Msc15_2	Pterosperma cuboides	1418.01	0	0	0	113.441	0	14.1801	0	0	0	0	0	0	0	0	0	0	0	0	0	0	0	0	0	0	0	0	0	0	0	0	0	0	0	0	0	0	0	0	0	0	0	0	0	0	0	0	0
Msc15_3	Pterosperma marginatum	288.505	5.7701	0	17.3103	34.6206	11.5402	17.3103	20.1953	5.7701	0	17.3103	0	0	0	0	0	0	0	0	0	0	0	0	0	0	0	0	0	0	0	0	0	0	0	0	0	0	0	0	0	0	0	0	0	0	0	0	0
Msc15_4	Pterosperma polygonum	445.124	0	53.4148	8.90247	0	8.90247	17.8049	13.3537	4.45124	4.45124	0	0	0	0	0	0	0	0	0	0	0	0	0	0	0	0	0	0	0	0	0	0	0	0	0	0	0	0	0	0	0	0	0	0	0	0	0	0
Msc15_5	Pterosperma undulatum	236	0	0	0	4.72	0	4.72	0	0	4.72	0	0	2.36	0	0	0	0	0	0	0	0	0	0	0	0	0	0	0	0	0	0	0	0	0	0	0	0	0	0	0	0	0	0	0	0	0	0	0
Msc16	Pyramimonas spp.	90	0	1.8	1.8	0	1.8	0	0	1.8	0	0	3.6	0	0	0	0.9	0	0	0	0	0	0	0	0	0	0.9	0	0	0	0	0	0	0	0	0	0	0	0	0	0	0	0	0	0	0	0	0	0
			0	0	0	0	0	0	0	0	0	0	0	0	0	0	0	0	0	0	0	0	0	0	0	0	0	0	0	0	0	0	0	0	0	0	0	0	0	0	0	0	0	0	0	0	0	0	0
	6. HAPTOPHYTA except Coccolithophores		0	0	0	0	0	0	0	0	0	0	0	0	0	0	0	0	0	0	0	0	0	0	0	0	0	0	0	0	0	0	0	0	0	0	0	0	0	0	0	0	0	0	0	0	0	0	0
Msc14	Phaeocystis spp.	21	15.12	15.96	144.06	159.6	89.88	36.96	154.56	128.73	83.79	139.44	0	15.12	4.2	0	0	0	0	0	2.94	0	1.26	0	15.54	18.9	7.98	47.46	54.18	15.12	4.2	5.46	4.62	10.92	5.88	3.78	4.2	140.7	276.36	65.1	0	0	0	0	0	0	0	0	0
			0	0	0	0	0	0	0	0	0	0	0	0	0	0	0	0	0	0	0	0	0	0	0	0	0	0	0	0	0	0	0	0	0	0	0	0	0	0	0	0	0	0	0	0	0	0	0
	7. COCCOLITHOPHORES		0	0	0	0	0	0	0	0	0	0	0	0	0	0	0	0	0	0	0	0	0	0	0	0	0	0	0	0	0	0	0	0	0	0	0	0	0	0	0	0	0	0	0	0	0	0	0
			0	0	0	0	0	0	0	0	0	0	0	0	0	0	0	0	0	0	0	0	0	0	0	0	0	0	0	0	0	0	0	0	0	0	0	0	0	0	0	0	0	0	0	0	0	0	0
CC1	Coccospheres (10-25µm)	241.168	0	33.7635	0	21.7051	7.23504	4.82336	12.0584	9.64672	7.23504	7.23504	14.4701	0	2.41168	0	0	0	0	0	0	0	0	0	0	0	0	31.3518	19.2934	28.9402	24.1168	0	0	0	0	0	0	0	0	0	57.8803	0	0	26.5285	0	0	0	0	0
CC2	Acanthoica sp. cf. quattrospina	48	0	0	0	0	0	0	0	0	0	0	0	0	0.48	0	1.44	0.48	0	0	0	0.96	1.92	1.44	0	0	0	0.48	0	0	0	0	0	0	0	0.48	0	0	0	1.44	0.96	1.44	2.4	1.92	0.48	1.44	0	0	0
CC4	Braarudosphaera sp. cf. bigelowii	90	0	0	0	0	0	0	0	0	4.5	0	0	0	0	0	0	0	0	0	0	0	0	0	0	0	0	0	0	0	0	0	0	0	0	0	0	0	0	0	0	0	0	0	0	0	0	0	0
CC5_1	Calcidiscus leptoporus_quadriperforatus	90	79.2	25.2	10.8	3.6	0	0	0	0	1.8	2.7	0.9	0	3.6	3.6	2.7	11.7	3.6	2.7	2.7	0.9	1.8	3.6	0	0.9	1.8	195.3	0	0	0	0	0	0	22.5	43.2	28.8	109.8	46.8	44.1	27	26.1	27.9	11.7	8.1	16.2	9	10.8	0.9
CC5_A	Calciosolenia brasiliensis	116.337	0	0	0	0	0	0	0	0	0	0	0	0	0	0	0	0	0	0	0	0	0	0	0	0	0	0	0	0	0	0	0	0	0	0	0	0	0	0	0	0	0	0	0	0	0	0	0
CC6	Calciosolenia murrayi	29	0	0	0	0	0	0	0	0	0	0	0	0	0	0	0	0	0	0	0	0	0	0	0	0	0	0	0	0	0	0	0	0	0	0	0	0	0	0	0	0	0	0	0	0	0	0	0
CC6_A	Ceratolithus cristatus	120	0	0	0	0	0	0	0	0	0	0	0	0	0	0	0	0	0	0	0	0	0	0	0	0	0	0	0	0	0	0	0	0	0	0	0	0	0	0	0	0	0	0	0	0	0	0	0
CC6_B	Coccolithus pelagicus	433	8.66	86.6	17.32	0	0	0	0	0	0	0	0	0	4.33	0	0	0	0	0	0	0	0	0	0	0	0	0	0	0	0	0	0	0	0	0	0	34.64	0	0	0	0	0	0	0	0	0	0	0
CC6_C	Coronosphaera mediterranea_binodata	48	0	0	0	0.96	0	0	0	0	0	0	0	0	4.32	0	0	0	0	0	0	0	0	0	0	0	0	0	0	0	0	0	0	0	0	0	1.92	0	0	0	0	0	0	0	0	1.44	1.44	1.44	0
CC&_D	Discosphaera tubifera	13	0	0	0	0	0	0	0	0	0	0.26	0.26	0.65	1.69	2.73	1.82	0.91	0	1.17	0	0	22.36	8.84	6.37	6.5	0	7.28	2.47	0	0	5.2	0.91	7.8	2.08	3.38	5.98	0	0	0	1.69	1.69	10.4	5.59	4.16	2.73	1.04	2.47	3.9
CC8_1	Emiliania huxleyi	13	182.26	88.66	152.36	36.79	16.9	6.89	12.48	8.19	1.95	4.81	2.86	2.6	6.5	12.22	40.04	8.58	3.12	2.73	4.81	1.04	6.76	5.59	2.73	3.38	15.08	14.17	71.76	25.61	24.44	23.53	15.21	5.85	1.95	2.99	9.49	25.61	2.47	20.8	24.44	24.18	50.57	46.54	11.31	13	9.88	15.6	8.84
CC8_A	Gephyrocapsa spp.	13	0	0	0	0	0	0	0	0	0	0	0	0	0	0	0	0	0	0	0	0	0	0	0	0	0	0	0	0	0	0	0	0	0.52	0	0	0	0	0	0.13	0	0	0	0	0	0	0	0
CC10	Helicosphaera spp. (inc. H. carteri + hyalina)	21	0	10.92	14.28	6.72	6.93	13.86	13.02	4.62	12.6	2.73	2.1	0.63	0.84	2.73	0	0.21	0.21	1.26	0.42	0	0	0	0	0	0.63	0.21	0.21	0	0	0.21	0.21	0.21	0	0.63	0.63	0.42	1.26	0	0	0	0	0.21	0.42	0	0	0	0
CC10_A	Holococcoliths group	86.67	52.002	24.2676	6.9336	12.1338	14.7339	4.3335	19.0674	4.3335	15.6006	26.8677	39.0015	19.0674	0	39.8682	76.2696	49.4019	16.4673	6.0669	58.0689	12.1338	26.001	62.4024	18.2007	49.4019	24.2676	22.5342	7.8003	23.4009	30.3345	10.4004	11.2671	45.0684	36.4014	12.1338	17.334	30.3345	19.0674	37.2681	19.0674	15.6006	43.335	69.336	100.537	58.9356	42.4683	43.335	66.7359
CC10_A1	Holococcoliths Syracosphaera_Coronosphaera group	55.4373	42.1323	0	55.4373	7.76122	7.76122	2.77187	0	1.66312	3.88061	9.42434	6.0981	2.21749	17.1856	0	6.0981	1.66312	0	2.21749	1.66312	0	0	11.0875	1.66312	2.77187	5.54373	8.3156	6.0981	3.32624	2.21749	12.1962	6.65248	12.7506	22.7293	13.8593	3.88061	5.54373	0	0	1.66312	4.43498	6.65248	22.1749	14.4137	8.86997	12.7506	6.0981	12.1962
CC10_B	Michaelsarsia elegans	90	0	0	0	0	0	0	0	0	0	0	0	0	0	0	0	0	0	0	0	0	0	0	0	0	0	0	0	0	0	0	0	0	0	0	0	0	0	0	0	0	0	0	0	0	0	0	0
CC11_1	Oolithothus fragilis_antillarum	88.598	0	0	0	0	0	0	0	0	0	0	0	0	0	0	0	0	0	0	0	0	0	0	0	0	0	0	0	0	0	0	0	0	0	0	0	0	0	0	0	0	0	0	0	0	0	0	0
CC12	Ophiaster spp. cf. hydroides_formosus	6.785	0	0	0	0	0	0	0.20355	0.06785	0	0	0.1357	0	0.1357	0	0	0	0	0	0	0	0	0	0	0	0.06785	0	0	0	0	0.06785	0	0	0	0	0	0	0	0.33925	0	0.1357	0	0.06785	0	0	0	0	0
CC14	Rhabdosphaera clavigera	13	0.26	0.78	2.34	0.13	0.26	0.52	1.82	0.13	1.95	2.6	1.04	0.39	0.78	1.04	0.13	0.52	0	0	0.52	0.13	0.13	0.91	0.52	0.26	0.91	0.13	1.04	0	0	0	0	0.13	0.91	1.17	1.69	0	0	0.52	0.65	0.39	1.95	1.95	0.52	0.65	0.26	0.26	0
CC15	Scyphosphaera apsteinii	2001	0	0	0	0	0	0	0	0	0	0	0	0	20.01	0	0	0	0	0	0	0	0	0	0	0	0	0	0	0	0	0	0	0	0	0	0	20.01	0	0	0	0	0	0	0	0	0	0	0
CC16_1	Syracosphaera molischii group	90	0	0	0	0	0	0	0	0	0	0	5.4	0	5.4	13.5	23.4	7.2	3.6	5.4	2.7	0	7.2	0	6.3	5.4	0	3.6	8.1	3.6	0	1.8	0	0	8.1	0	0	30.6	1.8	6.3	1.8	0	11.7	2.7	0.9	0	0	0	0
CC16_2	Syracosphaera nodosa group	90	27	5.4	0	4.5	0	0	0	0	0	0	0	0	2.7	0	0	0	0	0	0	0	0	0	0	0	5.4	0	0	0	0	0	0	0	0	0	0	0	0	0	10.8	1.8	3.6	0	0	1.8	1.8	2.7	0
CC16_3	Syracosphaera pulchra group	90	102.6	300.6	5.4	100.8	0	0	3.6	0	10.8	0	0	0	10.8	5.4	4.5	1.8	0.9	0	0	0	0	0	0	2.7	0	0	0	0.9	0	0	0	0	2.7	3.6	1.8	0	0	0	0	7.2	0	10.8	19.8	5.4	12.6	9	3.6
CC17	Umbellosphaera irregularis_tenuis	48	0	0	0	0	0	0	0	0	0	0	0	0	0	6.24	11.04	80.16	24.48	20.16	203.04	18.24	42.24	168.96	1.44	3.36	13.92	62.4	24	29.76	22.56	69.6	10.08	0	7.2	3.36	14.4	0	0	16.32	12	12.96	19.2	52.8	2.4	5.28	3.36	1.44	2.88
CC18	Umbilicosphaera spp. (U. sibogae)	2001	0	0	0	0	0	0	0	0	0	0	0	60.03	40.02	0	0	0	20.01	20.01	20.01	20.01	60.03	280.14	1260.63	300.15	560.28	40.02	60.03	0	0	0	0	0	20.01	60.03	140.07	1880.94	0	0	600.3	100.05	580.29	240.12	0	40.02	20.01	80.04	0
			0	0	0	0	0	0	0	0	0	0	0	0	0	0	0	0	0	0	0	0	0	0	0	0	0	0	0	0	0	0	0	0	0	0	0	0	0	0	0	0	0	0	0	0	0	0	0
			0	0	0	0	0	0	0	0	0	0	0	0	0	0	0	0	0	0	0	0	0	0	0	0	0	0	0	0	0	0	0	0	0	0	0	0	0	0	0	0	0	0	0	0	0	0	0
			0	0	0	0	0	0	0	0	0	0	0	0	0	0	0	0	0	0	0	0	0	0	0	0	0	0	0	0	0	0	0	0	0	0	0	0	0	0	0	0	0	0	0	0	0	0	0
			0	0	0	0	0	0	0	0	0	0	0	0	0	0	0	0	0	0	0	0	0	0	0	0	0	0	0	0	0	0	0	0	0	0	0	0	0	0	0	0	0	0	0	0	0	0	0
			0	0	0	0	0	0	0	0	0	0	0	0	0	0	0	0	0	0	0	0	0	0	0	0	0	0	0	0	0	0	0	0	0	0	0	0	0	0	0	0	0	0	0	0	0	0	0
			0	0	0	0	0	0	0	0	0	0	0	0	0	0	0	0	0	0	0	0	0	0	0	0	0	0	0	0	0	0	0	0	0	0	0	0	0	0	0	0	0	0	0	0	0	0	0
			0	0	0	0	0	0	0	0	0	0	0	0	0	0	0	0	0	0	0	0	0	0	0	0	0	0	0	0	0	0	0	0	0	0	0	0	0	0	0	0	0	0	0	0	0	0	0
			0	0	0	0	0	0	0	0	0	0	0	0	0	0	0	0	0	0	0	0	0	0	0	0	0	0	0	0	0	0	0	0	0	0	0	0	0	0	0	0	0	0	0	0	0	0	0
			0	0	0	0	0	0	0	0	0	0	0	0	0	0	0	0	0	0	0	0	0	0	0	0	0	0	0	0	0	0	0	0	0	0	0	0	0	0	0	0	0	0	0	0	0	0	0
			0	0	0	0	0	0	0	0	0	0	0	0	0	0	0	0	0	0	0	0	0	0	0	0	0	0	0	0	0	0	0	0	0	0	0	0	0	0	0	0	0	0	0	0	0	0	0
			0	0	0	0	0	0	0	0	0	0	0	0	0	0	0	0	0	0	0	0	0	0	0	0	0	0	0	0	0	0	0	0	0	0	0	0	0	0	0	0	0	0	0	0	0	0	0
			0	0	0	0	0	0	0	0	0	0	0	0	0	0	0	0	0	0	0	0	0	0	0	0	0	0	0	0	0	0	0	0	0	0	0	0	0	0	0				0	0	0	0	0
			0	0	0	0	0	0	0	0	0	0	0	0	0	0	0	0	0	0	0	0	0	0	0	0	0	0	0	0	0	0	0	0	0	0	0	0	0	0	0				0	0	0	0	0
			0	0	0	0	0	0	0	0	0	0	0	0	0	0	0	0	0	0	0	0	0	0	0	0	0	0	0	0	0	0	0	0	0	0	0	0	0	0	0				0	0	0	0	0
			0	0	0	0	0	0	0	0	0	0	0	0	0	0	0	0	0	0	0	0	0	0	0	0	0	0	0	0	0	0	0	0	0	0	0	0	0	0	0				0	0	0	0	0
			0	0	0	0	0	0	0	0	0	0	0	0	0	0	0	0	0	0	0	0	0	0	0	0	0	0	0	0	0	0	0	0	0	0	0	0	0	0	0				0	0	0	0	0
			0	0	0	0	0	0	0	0	0	0	0	0	0	0	0	0	0	0	0	0	0	0	0	0	0	0	0	0	0	0	0	0	0	0	0	0	0	0	0				0	0	0	0	0
			0	0	0	0	0	0	0	0	0	0	0	0	0	0	0	0	0	0	0	0	0	0	0	0	0	0	0	0	0	0	0	0	0	0	0	0	0	0	0				0	0	0	0	0
			0	0	0	0	0	0	0	0	0	0	0	0	0	0	0	0	0	0	0	0	0	0	0	0	0	0	0	0	0	0	0	0	0	0	0	0	0	0	0				0	0	0	0	0
[truncated: 56 more columns]
